# Supplementary material for: Downregulation of E-cadherin in pluripotent stem cells triggers partial EMT
Source: PubMed Central journal article supplement (PMC7820496; doi:10.1038/s41598-021-81735-1), 2021-01-21
Supplement: 41598_2021_81735_MOESM1_ESM.pdf [file 41598_2021_81735_MOESM1_ESM.pdf]

# Downregulation of E-cadherin in pluripotent stem cells triggers partial EMT

Aban C.E.<sup>1</sup>

Lombardi A.<sup>1</sup>

Neiman G.<sup>1</sup>

Biani M.C.<sup>1</sup>

La Greca A.<sup>1</sup>

Waisman A.<sup>1</sup>

Moro L.N.<sup>1</sup>

Sevlever G.<sup>1</sup>

Miriuka S.<sup>1</sup>

Luzzani C.<sup>1,\*</sup>

<sup>1</sup> LIAN-CONICET, FLENI, Buenos Aires, Argentina

\* Corresponding author: [cluzzani@fleni.org.ar](mailto:cluzzani@fleni.org.ar)

Key words: Embryonic stem cells, E-cadherin, partial EMT

## Supplemental Material

S1

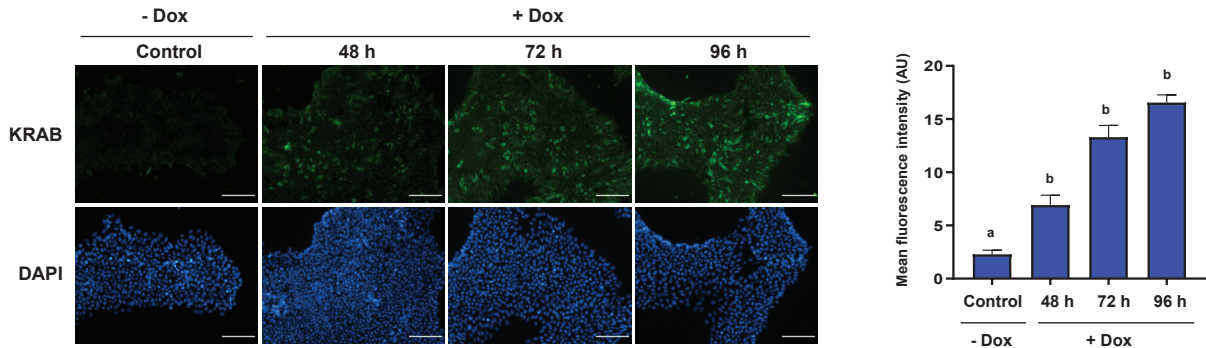

**Figure S1. Expression of KRAB increased gradually after Dox incubation.** Left panel: Immunofluorescence images of KRAB protein expression in cells incubated with Dox during 48, 72 and 96 h. Nuclei were stained with DAPI. Representative images of at least three experiments are shown. Scale bar 100  $\mu$ m. Right panel: Quantification of the mean fluorescence intensity of three images from three independent experiments. Results are represented as mean  $\pm$  SD (n=3). Different letters indicate significant differences of groups compared to control condition (p<0.0001) for ANOVA with post hoc Tukey.

S2

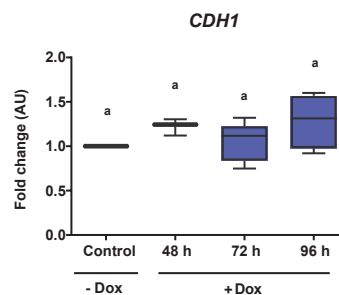

**Figure S2. E-cadherin levels were not affected in parental HES3 cells after Dox incubation.** Relative mRNA levels of CDH1 in parental HES3 wild type cells after incubation with Dox at different times assessed by qPCR. AU is the abbreviation for arbitrary units. Results are represented as mean  $\pm$  SD (n=5). Different letters indicate significant differences of groups compared to control condition for ANOVA with post hoc Tukey.

S3

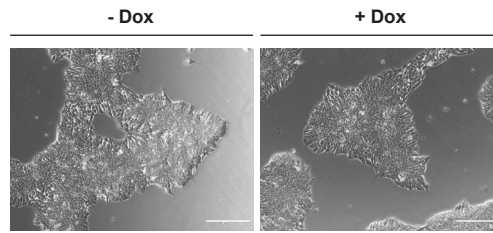

**Figure S3. Cell morphology was not affected in parental HES3 cells incubated with Dox.** Representative images of parental HES3 wild type cells incubated with (+Dox) or without Dox (-Dox) for 96h. Scale bar 200  $\mu$ m.

S4

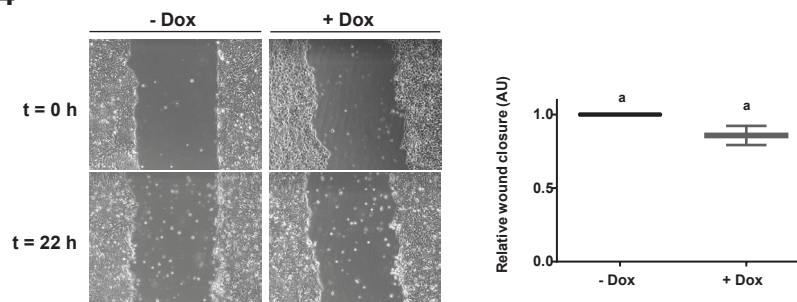

**Figure S4. Cell migration was not enhanced in parental HES3 cells after Dox incubation.** Wound healing assay was made after parental HES3 wild type cells were treated with or without Dox (+Dox and -Dox, respectively) (t=0h). Representative images of at least three experiments are shown. Images were taken at t=0 h and after 22 h of recovery (t=22h).

**Table S1** - sgRNA sequences

| <b>Name</b>     | <b>Sequence</b>             |
|-----------------|-----------------------------|
| sgRNA1 Coding   | ACACCGCAGTTCCGACGCCACTGAGG  |
| sgRNA1 Template | AAAACCTCAGTGGCGTCGGAACTGCG  |
| sgRNA2 Coding   | ACACCGCGCCGGGTGCGGTCCGGTCCG |
| sgRNA2 Template | AAAACGACCCGACCGCACCCGGCGCG  |

**Table S2** - Primers sequences

| <b>Gene</b>  | <b>Sequence</b>                                                 |
|--------------|-----------------------------------------------------------------|
| <i>CDH1</i>  | Forward AAAGGCCCATTTCTAAAAACCT<br>Reverse TGCATTCTCTATCCAGAGGCT |
| <i>TJP1</i>  | Forward GGCAGCAAGAGATGGCAATA<br>Reverse ACGGTAGCCCGTTCAATCTCT   |
| <i>OCLN</i>  | Forward GTTGCGGCGAGCGGATTG<br>Reverse TGGACTTTCAAGAGGCCTGG      |
| <i>CLDN3</i> | Forward ACGCGAGAAGAAGTACACGG<br>Reverse GTAGTCCTTGCGGTCTAGC     |
| <i>GJA1</i>  | Forward GTGCCTGAACTTGCCTTTTC<br>Reverse CCCTCCAGCAGTTGAGTAGG    |
| <i>DSC2</i>  | Forward AACGGAGGTCAGGAGACCAT<br>Reverse TTTTTCACCAAGACGGGGCT    |
| <i>DSG2</i>  | Forward TTCGGGAGGGAGAGGATCTG<br>Reverse TCCTCTTGCATCCAAAGCGT    |
| <i>DSP</i>   | Forward GTGTCCTGGCACTACTGCAT<br>Reverse CTTCTGGGCATCGGTGAACT    |
| <i>NANOG</i> | Forward AAAGGATCTTCACCTATGCC<br>Reverse GAAGGAAGAGGAGAGACAGT    |

|                          |                                                                   |
|--------------------------|-------------------------------------------------------------------|
| <i>OCT4</i>              | Forward CTGGGTTGATCCTCGGACCT<br>Reverse CACAGAACTCATACGGCGGG      |
| <i>LIN28A</i>            | Forward TCAGGCTTGGGTTACACCATCAC<br>Reverse GGTTGCCCCAGAACCCTCAC   |
| <i>SNAI1</i>             | Forward ATGCACATCCGAAGCCACA<br>Reverse GAGGGTCAGCGGGGACATC        |
| <i>SNAI2</i>             | Forward TCAAGGACACATTAGAACTCAC<br>Reverse CTACACAGCAGCCAGATTC     |
| <i>ZEB1</i>              | Forward TTACACCTTTGCATACAGAACCC<br>Reverse TTTACGATTACACCCAGACTGC |
| <i>ZEB2</i>              | Forward GGAGACGAGTCCAGCTAGTGT<br>Reverse CCACTCCACCCTCCCTTATTTTC  |
| <i>TBX6</i>              | Forward CAGCCTACCAGAACCCACAG<br>Reverse GTGTGTCTCCGCTCCCATAG      |
| <i>MIXL1</i>             | Forward GGTACCCCGACATCCACTT<br>Reverse TGGAAGGATTTCCCACTCTG       |
| <i>LINC-ROR</i>          | Forward CACTCCAGCTATGCAGACCA<br>Reverse CTGACCTGTTGACCCACCTT      |
| <i>MALAT1</i>            | Forward TGTTCTGATCCCGCTGCTATT<br>Reverse ACGACTGCTTAAACTGCAGAAA   |
| <i>CCND1</i> (cyclin D1) | Forward GATCAAGTGTGACCCGGACT<br>Reverse TCCTCCTCCTCTTCCTCCTC      |
| <i>MYCBP</i> (c-myc)     | Forward CCTGGCTCCCCTCCTGCCTCGA<br>Reverse GCTCCCTCTGCCTCTCGCTGGA  |
| <i>RPL7</i>              | Forward AATGGCGAGGATGGCAAG<br>Reverse TGACGAAGGCGAAGAAGC          |
| <i>HPRT1</i>             | Forward TGACACTGGCAAACAATGCA<br>Reverse GGTCCTTTTACACAGCAAGCT     |

|        |                                                               |
|--------|---------------------------------------------------------------|
| NKX2.5 | Forward CCCACGCCCTTCTCAGTCAA<br>Reverse GTAGGCCTCTGGCTTGAAGG  |
| GATA4  | Forward CATCAAGACGGAGCCTGGCC<br>Reverse TGA CTGTCGGCCAAGACCAG |
| TUBB3  | Forward TGGATTCCGGTCCTGGATGTG<br>Reverse ACCTTGCTGATGAGCAACGT |
